# Supplementary material
Source: Royal Society of Chemistry journal article supplement (doi:10.1039/d6sm00402d)
Supplement: d6sm00402d1.pdf [file d6sm00402d1.pdf]

**Supplementary Information**  
**Growth Pathway of AB<sub>2</sub>-Type Colloidal Alloy during Colloidal**  
**Heteroepitaxy**

Masahide Sato\*

*Emerging Media Initiative, Kanazawa University, Kanazawa 920-1192, Japan.*

Jun Nozawa

*Institute for Materials Research, Tohoku University,  
2-1-1 Katahira, Aoba-ku, Sendai 980-8577, Japan.*

---

\* msat002@staff.kanazawa-u.ac.jp

TABLE S1. Energy gains caused by the formation of AB<sub>2</sub> structure for the parameter sets used in our simulations, where  $R_{\text{Sub}} = 0.5$ .

| $(R_A/R_{\text{Sub}}, R_B/R_{\text{Sub}})$ | $\epsilon_{\text{SA}}/\epsilon_0$ | $\epsilon_{\text{SB}}/\epsilon_0$ | $\epsilon_{\text{AB}}/\epsilon_0$ | $\epsilon_A/\epsilon_0$ | $\epsilon_B/\epsilon_0$ | $\bar{\epsilon}_{\text{AB}_2}/\epsilon_0$ |
|--------------------------------------------|-----------------------------------|-----------------------------------|-----------------------------------|-------------------------|-------------------------|-------------------------------------------|
| (1.2, 0.8)                                 | 0.272                             | 0.222                             | 0.240                             | 1.54                    | 1.03                    | 1.20                                      |
| (1.15, 0.85)                               | 0.262                             | 0.229                             | 0.244                             | 1.54                    | 1.06                    | 1.22                                      |
| (1.1, 0.9)                                 | 0.261                             | 0.239                             | 0.248                             | 1.53                    | 1.08                    | 1.23                                      |
| (1.05, 0.95)                               | 0.256                             | 0.243                             | 0.249                             | 1.52                    | 1.10                    | 1.24                                      |

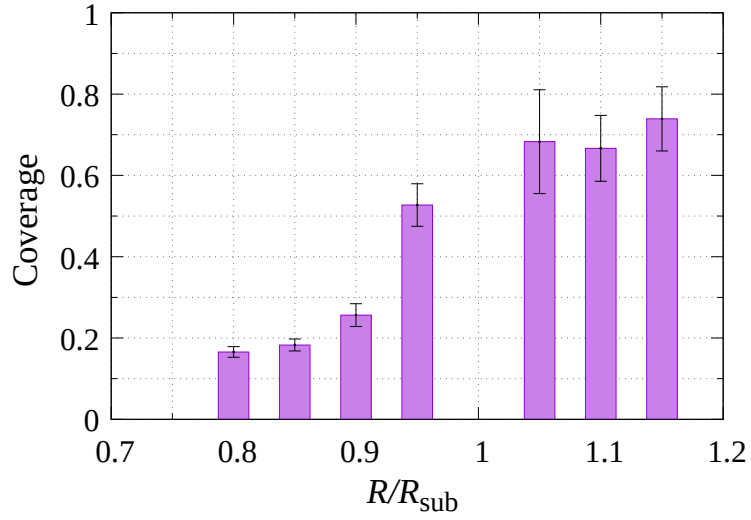

FIG. S1. Dependence of the coverage of the substrate by epitaxial particles on the particle radius  $R$ . The data were averaged over 20 individual runs, which were measured at  $t = 2000$ .

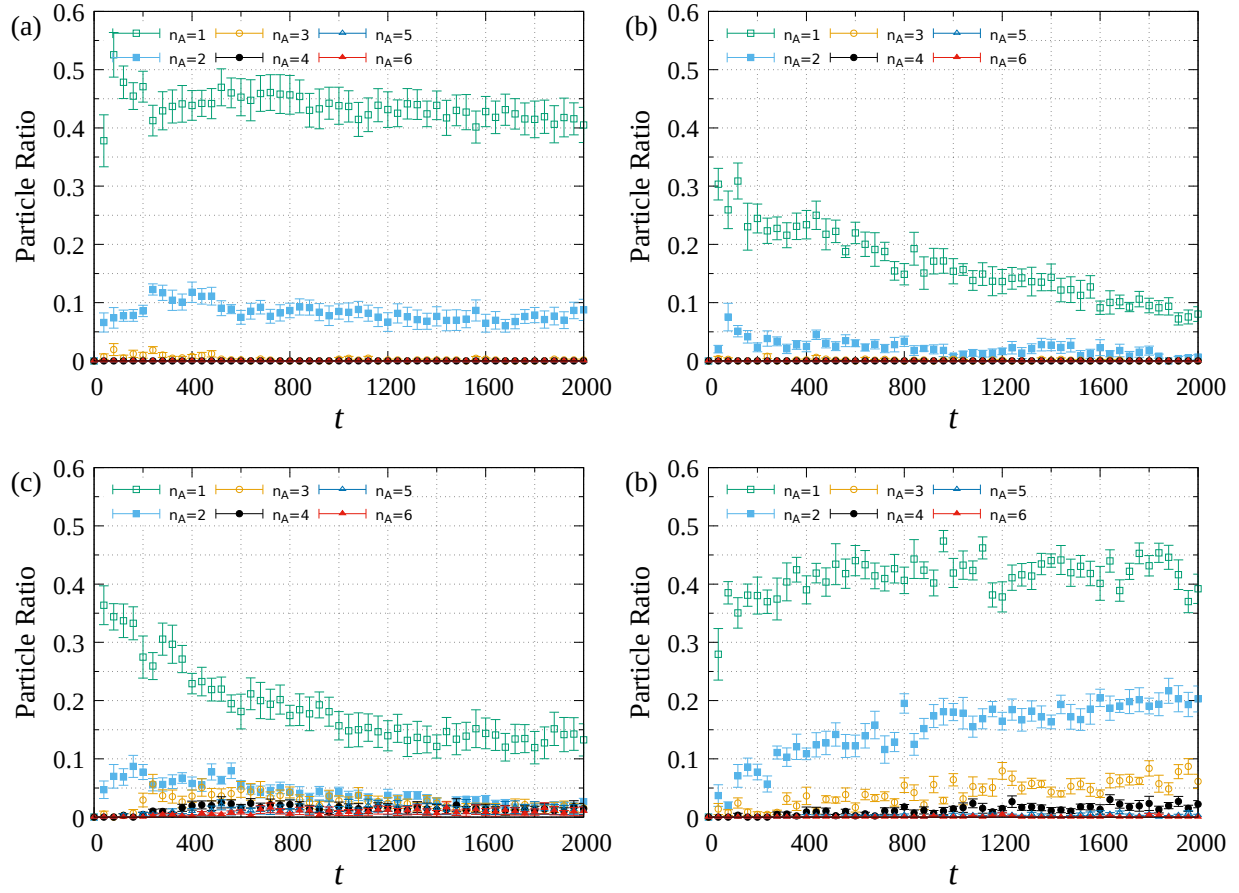

FIG. S2. Time dependence of the fraction of A particles attached to  $n_A$  A particles, normalized by the total number of A particles on the substrate, for different radius ratios  $((R_A/R_{\text{Sub}}, R_B/R_{\text{Sub}})$ : (a) (1.05, 0.95), (b) (1.1, 0.9), (c) (1.15, 0.85), and (d) (1.2, 0.8). The data are averaged over 20 independent runs.

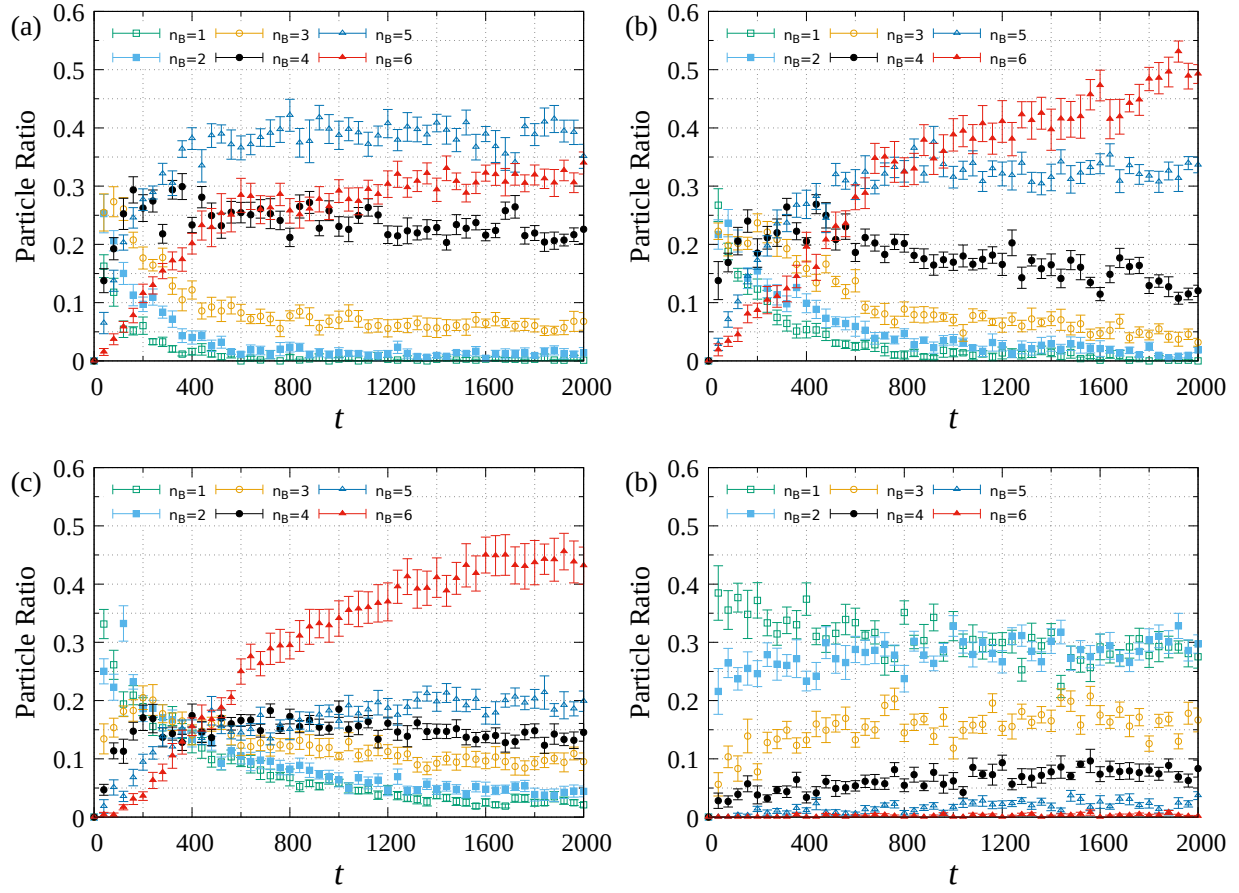

FIG. S3. Time dependence of the fraction of A particles attached to  $n_B$  B particles, normalized by the total number of A particles on the substrate, for different radius ratios  $((R_A/R_{\text{Sub}}, R_B/R_{\text{Sub}})$ : (a) (1.05, 0.95), (b) (1.1, 0.9), (c) (1.15, 0.85), and (d) (1.2, 0.8). The data are averaged over 20 independent runs.

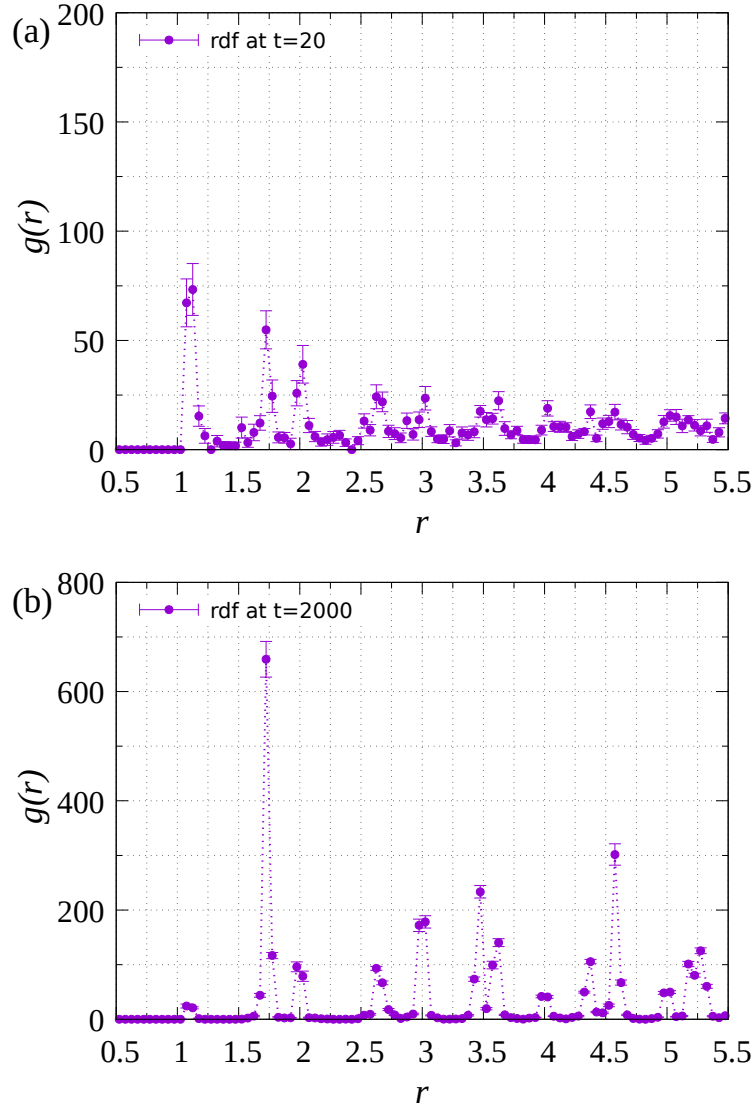

FIG. S4. Radial distribution functions  $g(r)$  for  $(R_A/R_{\text{Sub}}, R_B/R_{\text{Sub}}) = (1.1, 0.9)$  with  $N_A = 200$  and  $N_B = 600$  at (a)  $t = 20$  and (b)  $t = 2000$ .

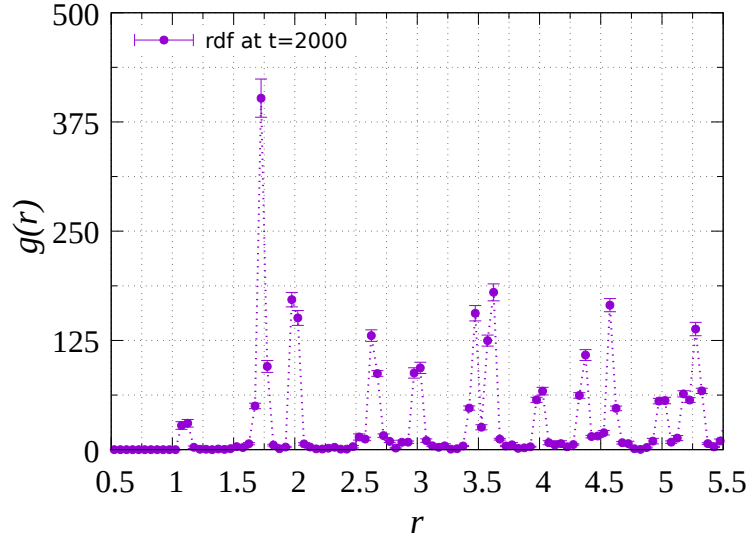

FIG. S5. Radial distribution function for  $(R_A/R_{\text{Sub}}, R_B/R_{\text{Sub}}) = (1.1, 0.9)$  with  $N_A = 200$  and  $N_B = 1200$  at  $t = 2000$ .
